# Supplementary material for: Patients Admitted for Variant Alpha COVID-19 Have Poorer Outcomes than Those Infected with the Old Strain
Source: MDPI journal article supplement (doi:10.3390/jcm10163550), 2021-08-12
Supplement: s1 [file s1]

**Table S1: Spearman's rho correlations for laboratory markers.**

|              |                | IL-6             | CRP              | Leucocytes       | Neutrophiles     | Hemoglobin   | Lymphocytes      | Platelets        | D-dimers     | N/L ratio        |
|--------------|----------------|------------------|------------------|------------------|------------------|--------------|------------------|------------------|--------------|------------------|
| CRP          | Spearman's Rho | <b>0.40</b>      | -                | -                | -                | -            | -                | -                | -            | -                |
|              | P-value        | <b>&lt;0.001</b> | -                | -                | -                | -            | -                | -                | -            | -                |
| Leucocytes   | Spearman's Rho | <b>0.26</b>      | <b>0.47</b>      | -                | -                | -            | -                | -                | -            | -                |
|              | P-value        | <b>0.015</b>     | <b>&lt;0.001</b> | -                | -                | -            | -                | -                | -            | -                |
| Neutrophiles | Spearman's Rho | <b>0.34</b>      | <b>0.54</b>      | <b>0.97</b>      | -                | -            | -                | -                | -            | -                |
|              | P-value        | <b>0.002</b>     | <b>&lt;0.001</b> | <b>&lt;0.001</b> | -                | -            | -                | -                | -            | -                |
| Hemoglobin   | Spearman's Rho | -0.16            | 0.04             | 0.01             | 0.01             | -            | -                | -                | -            | -                |
|              | P-value        | 0.150            | 0.589            | 0.911            | 0.911            | -            | -                | -                | -            | -                |
| Lymphocytes  | Spearman's Rho | -0.01            | -0.13            | <b>0.20</b>      | 0.01             | 0.01         | -                | -                | -            | -                |
|              | P-value        | 0.920            | 0.113            | <b>0.014</b>     | 0.855            | 0.895        | -                | -                | -            | -                |
| Platelets    | Spearman's Rho | 0.03             | 0.13             | <b>0.47</b>      | <b>0.44</b>      | <b>-0.23</b> | 0.17             | -                | -            | -                |
|              | P-value        | 0.783            | 0.094            | <b>&lt;0.001</b> | <b>&lt;0.001</b> | <b>0.004</b> | 0.031            | -                | -            | -                |
| D-dimers     | Spearman's Rho | <b>0.29</b>      | <b>0.29</b>      | <b>0.22</b>      | <b>0.28</b>      | -0.16        | -0.04            | 0.18             | -            | -                |
|              | P-value        | <b>0.040</b>     | <b>0.009</b>     | <b>0.052</b>     | <b>0.012</b>     | 0.152        | 0.711            | 0.119            | -            | -                |
| N/L ratio    | Spearman's Rho | <b>0.29</b>      | <b>0.49</b>      | <b>0.63</b>      | <b>0.77</b>      | 0.00         | <b>-0.57</b>     | <b>0.23</b>      | <b>0.25</b>  | -                |
|              | P-value        | <b>0.009</b>     | <b>&lt;0.001</b> | <b>&lt;0.001</b> | <b>&lt;0.001</b> | 0.968        | <b>&lt;0.001</b> | <b>0.004</b>     | <b>0.027</b> | -                |
| P/L ratio    | Spearman's Rho | 0.03             | <b>0.19</b>      | <b>0.17</b>      | <b>0.29</b>      | <b>-0.19</b> | <b>-0.67</b>     | <b>0.56</b>      | 0.19         | <b>0.62</b>      |
|              | P-value        | 0.785            | <b>0.017</b>     | <b>0.039</b>     | <b>&lt;0.001</b> | <b>0.017</b> | <b>&lt;0.001</b> | <b>&lt;0.001</b> | 0.085        | <b>&lt;0.001</b> |

N/L = Neutrophil to Lymphocyte; P/L = Platelet to Lymphocyte
